# Supplementary material for: Strontium-doped mesoporous bioglass nanoparticles for enhanced wound healing with rapid vascularization
Source: Royal Society of Chemistry journal article supplement (doi:10.1039/d3tb01256e), 2023-01-01
Supplement: d3tb01256e1.pdf [file d3tb01256e1.pdf]

## **Strontium-doped mesoporous bioglass nanoparticles for enhanced wound healing with rapid vascularization**

Juan Du,<sup>a</sup> Linpeng Fan,<sup>a,\*</sup> Joselito M. Razal,<sup>a</sup> Sihao Chen,<sup>b</sup> Hongmei Zhang,<sup>b,\*</sup>

Hongjun Yang,<sup>c</sup> Haiyan Li,<sup>d</sup> Jingliang Li<sup>a,\*</sup>

### **1. Supplementary experimental section**

#### **1.1 Preparation of radial wrinkle mesoporous bioglass with different**

A certain amount of CTAB and pure water (40 mL) was added to the flask, TEA was utilized to adjust the pH to alkaline. After stirring for 30 min, CaNO<sub>3</sub> and TEP were added into the flask and stirred for 1 h. After that, TEOS was dissolved into an appropriate amount of cyclohexane solution, and mixed evenly by magnetic stirring. The TEOS/cyclohexane mixture was then added to the flask and reacted at 60 °C for different durations (24, 48 and 72 h). At the end of the reaction, the samples were centrifuged at 12000 r/min, washed with ethanol three times, and then freeze-dried. Then, the samples were calcined in a muffle furnace at 550 °C for 3 h to get target radial wrinkle mesoporous bioglass (rMBG). The products were named as dMBG-24 h, rMBG-48 h, and dMBG-72 h, respectively.

#### **1.2 The element analysis of rMBG and rMBG/Sr**

The chemical composition (C, N, O, Si, P, Ca, Sr) of the bioglass particles was determined by electron energy spectroscopy (EDS, attached to a scanning electron microscope (S-4800, Hitachi)) mapping of elements.

#### **1.3 The chemical composition of bioactive sponge (SF/rMBG/Sr)**

The chemical composition (C, N, O, Si, P, Ca, Sr) of SF/rMBG/Sr sponge was determined by electron energy spectroscopy (EDS, attached to a scanning electron microscope (S-4800, Hitachi)) mapping of elements to evaluate the loading of rMBG/Sr.

#### **1.4 Cell cytoendocytosis of rMBG and rMBG/Sr**

---

\* Corresponding Authors

E-mail addresses: [plfanc@163.com](mailto:plfanc@163.com) (L. Fan); [hongmei\\_zhang97@163.com](mailto:hongmei_zhang97@163.com) (H. Zhang); [jingliang.li@deakin.edu.au](mailto:jingliang.li@deakin.edu.au) (J. Li).

As 100  $\mu\text{g/mL}$  of bioglass nanoparticles exhibited excellent activity for NIH-3T3 and HUVECs, this concentration was used to prove cell cytoendocytosis the nanoparticles. Briefly, nanoparticles was labeled with FITC (green). Then, HUVECs were resuscitated and added into 24-well cell culture plates at a density of  $1 \times 10^4$  per well. 500  $\mu\text{L}$  particle/DMEM mixed medium (particle concentration 100  $\mu\text{g/mL}$ ) were added to each well, then the culture plates were placed in the cell incubator. After 48 h, the cells were fixed with 4% paraformaldehyde for 4 h. Rhodamine labeled phalloidine (red) and DAPI (blue) were utilized to stain cells after culture for 48 h and cells were observed with an inverted fluorescence microscope.

### Supplementary figures

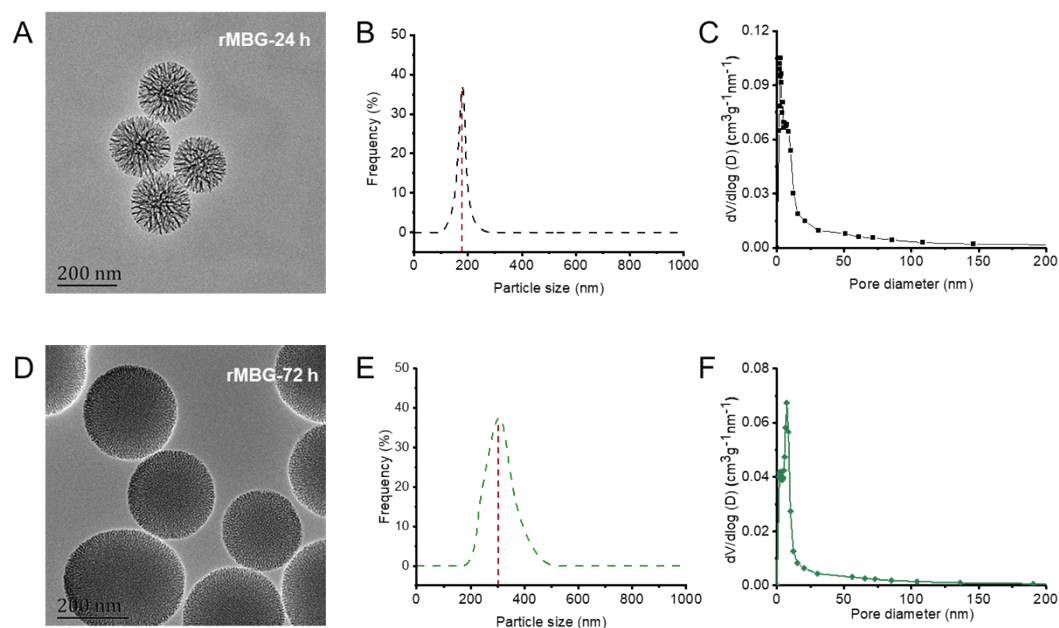

**Figure S1** (A) TEM micrographs of rMBG-24 h, (B) pore size distribution of rMBG-24 h, (C) pore diameter distribution of rMBG-24 h, (D) TEM micrographs of rMBG-72 h, (E) pore size distribution of rMBG-72 h, (F) pore diameter distribution of rMBG-72 h.

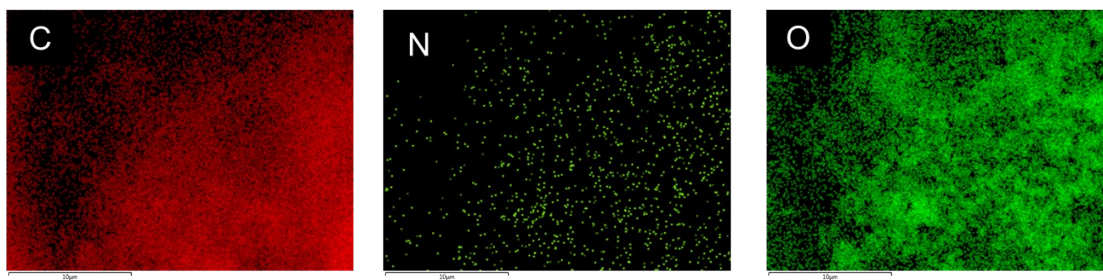

**Figure S2** EDS mapping of rMBG/Sr about C, N and O.

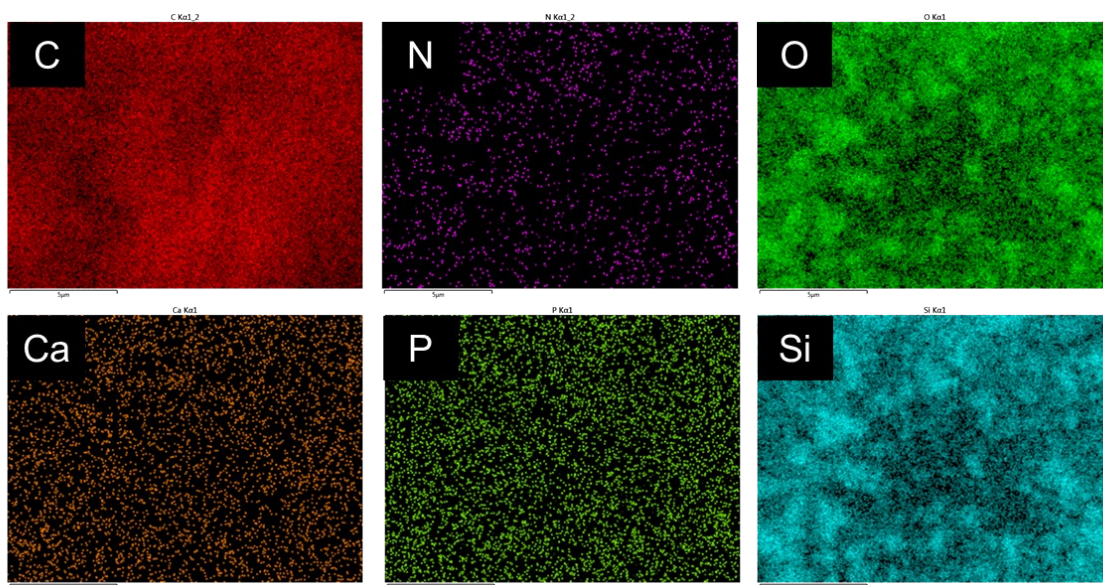

**Figure S3** EDS mapping of rMBG about C, N, O, Ca, P and Si.

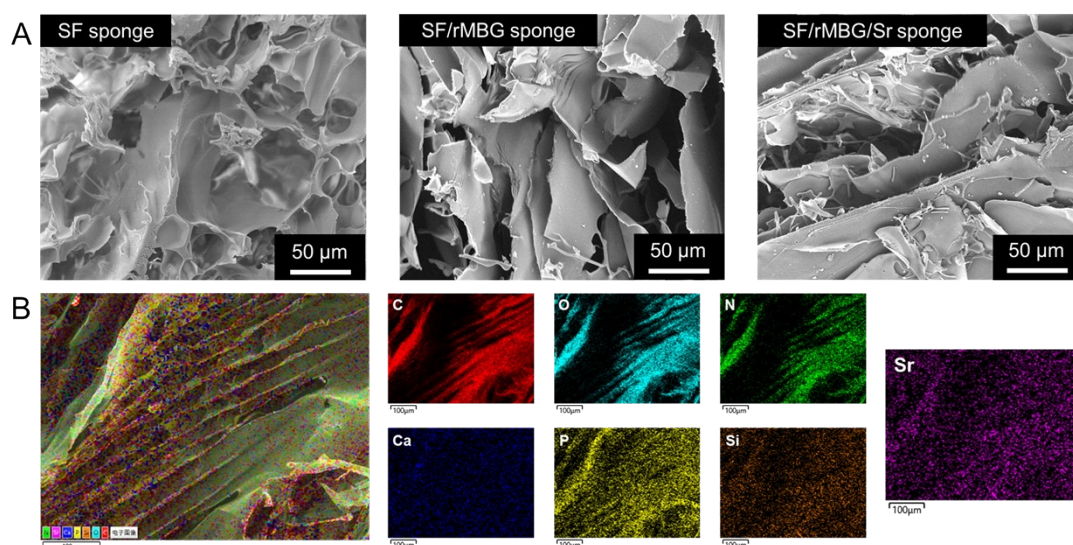

**Figure S4** (A) Morphology of SF sponge, SF/rMBG sponge and SF/rMBG/Sr sponge. (B)

Element distribution in SF/rMBG/Sr sponge.



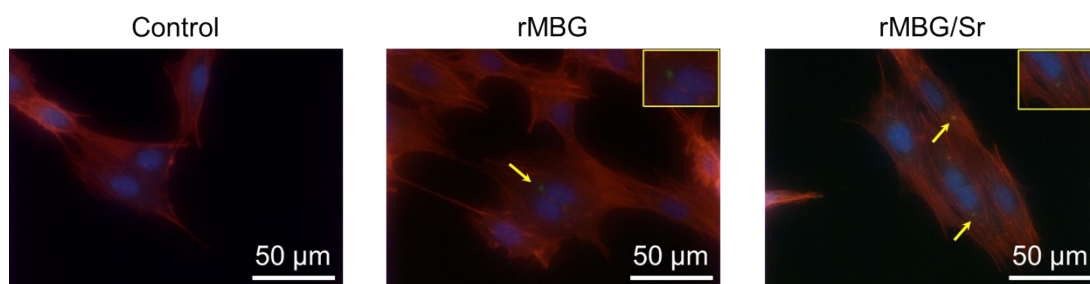

**Figure S5** Cell cytoendocytosis of rMBG and rMBG/Sr. Red-cytoskeleton; Blue-cell nucleus; Green-FITC-labeled nanoparticles.

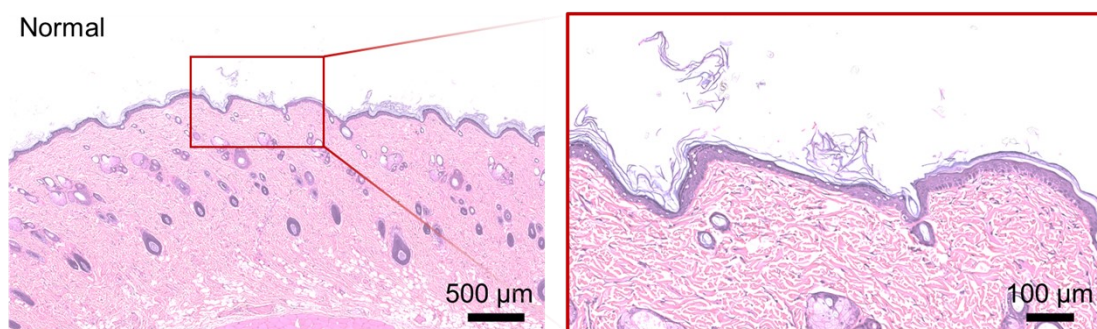

**Figure S6** HE staining of normal tissue.

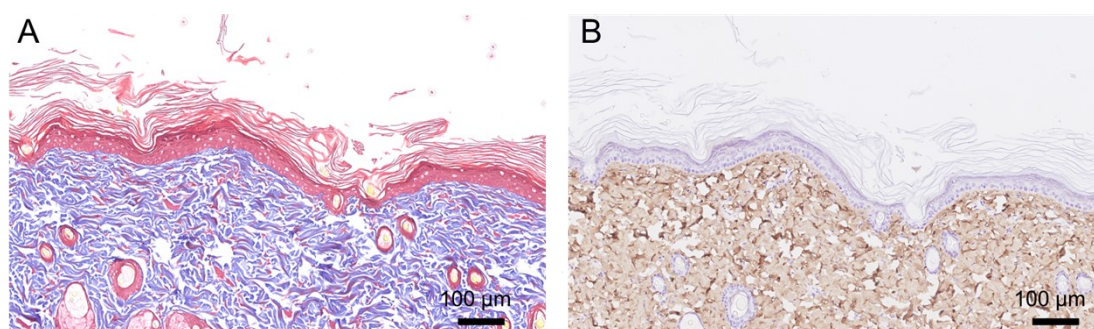

**Figure S7** Masson staining (A) and Col I staining (B) of normal tissue.
